# Supplementary material for: Mass mortality event of the giant barrel sponge Xestospongia sp.: population dynamics and size distribution in Koh Phangan, Gulf of Thailand
Source: PeerJ. 2023 Dec 12;11:e16561. doi: 10.7717/peerj.16561 (PMC10722979; doi:10.7717/peerj.16561)
Supplement: Supplemental Information 3 [file peerj-11-16561-s003.xlsx]

## Sheet: Overview Abundances
Overview Abundances
transect		Mae Haad				Haad Khom						Koh Yippon						Hin Yippon
	2015.1	2015.2, 4m	2015.2, 6m	2016	2015.1, 4m	2015.1, 6m	2015.2, 4m	2015.2, 6m	2016, 4m	2016, 6m	2015.1, 4m	2015.1, 6m	2015.2, 4m	2015.2, 6m	2016, 4m	2016, 6m	2015.1, 4m	2015.1, 6m	2015.2, 4m	2015.2, 6m	2016, 4m	2016, 6m
T1		24	2		8	9	4	8	2	3	51	31			15	32	19	23			15	19
T2		10	6		15	8	6	8	4	2	47	41			22	56	37	41			43	47
T3		1	1		4	8	2	5	1	2	57	36			11		32	30			16
T4	timed swim			timed swim	9	5	12	14	1	1
T5					10	10	34	6	2	1
T6					16	6	17	6	2	0
Total	128	35	9	2	62	46	75	47	12	9	155	108	no data	no data	48	88	88	94	no data	no data	74	66
Total 4+6m	128		44	2		108		122		21		263		no data		136		182		no data		140
