# Supplementary material for: Mass mortality event of the giant barrel sponge Xestospongia sp.: population dynamics and size distribution in Koh Phangan, Gulf of Thailand
Source: PeerJ. 2023 Dec 12;11:e16561. doi: 10.7717/peerj.16561 (PMC10722979; doi:10.7717/peerj.16561)
Supplement: Supplemental Information 4 [file peerj-11-16561-s004.xlsx]

## Sheet: Mae Haad
Mae Haad
				alpha	0.01946
				beta	1.214
Survey year 2015.1										Survey year 2016
Nr. of Sponge	osculum diameter [cm]	height [cm]	base diameter [cm]	bc = bd * Pi [cm]	V_sponge [cm³]	V_spongocoel [cm³]	V_final [cm³]			Nr. of Sponge	osculum diameter [cm]	height [cm]	base diameter [cm]	bc = bd * Pi [cm]	V_sponge [cm³]	V_spongocoel [cm³]	V_final [cm³]
1	9	39	26.1014	82	10181.6	1427.67	8753.88			1	9	12	17	53.4071	1643.05	155.935	1487.12
2	15	36	32.7859	103	16886.4	2638.6	14247.8			2	10	35	20	62.8319	6414.09	814.712	5599.37
3	14	66	35.0141	110	33040.2	5960.19	27080
4	5	12	10.1859	32	564.489	42.6239	521.865
5	6	25	20.3718	64	3751.86	424.892	3326.97
6	11	16	19.0986	60	2914.73	312.727	2602
7	12	42	44.5634	140	29299.4	5151.22	24148.2
8	1	2	2.54648	8	5.25224	0.145761	5.10648
9	2	6	2.86479	9	28.1747	1.12014	27.0546
10	1	2	1.90986	6	3.43346	0.0870004	3.34646
11	2	3	3.1831	10	16.0993	0.567816	15.5315
12	1	4	5.41127	17	37.3777	1.57868	35.799
13	6	28	23.5549	74	5367.05	656.208	4710.84
14	5	19	16.5521	52	1898.81	185.875	1712.94
15	3	9	10.1859	32	337.668	22.8417	314.826
16	7	35	20.6901	65	5698.58	705.737	4992.84
17	17	43	27.0563	85	16672.2	2598.02	14074.2
18	4	9	10.1859	32	378.161	26.2085	351.953
19	3	12	9.86761	31	427.17	30.3873	396.783
20	1	11	7.00282	22	164.27	9.52424	154.746
21	15	30	15.2789	48	5400.61	661.193	4739.42
22	2	14	7.00282	22	245.733	15.5298	230.203
23	3	14	13.369	42	835.068	68.5667	766.502
24	9	32	21.6451	68	6235.56	787.266	5448.29
25	18	46	26.1014	82	17764.4	2806.06	14958.3
26	14	32	32.7859	103	14492.5	2191.66	12300.9
27	9	40	27.3747	86	11275.6	1616	9659.63
28	1	3	2.22817	7	6.43469	0.186507	6.24819
29	1	1	1.90986	6	1.71673	0.0375034	1.67923
30	1	5	3.50141	11	21.9405	0.826828	21.1136
31	3	32	11.1408	35	1395.21	127.86	1267.35
32	3	22	1.27324	4	83.1734	4.16873	79.0046
33	1	9	2.86479	9	28.4435	1.13313	27.3104
34	21	61	38.5155	121	43649.7	8357.56	35292.1
35	12	41	32.1493	101	16780.9	2618.59	14162.3
36	16	41	37.2423	117	24031.4	4049.58	19981.9
37	5	19	10.8225	34	976.135	82.872	893.263
38	4	45	19.0986	60	5385.68	658.975	4726.7
39	3	25	9.23099	29	797.86	64.8757	732.985
40	1	21	3.1831	10	78.702	3.89825	74.8038
41	14	70	44.5634	140	51418.7	10196.3	41222.3
42	13	23	24.1916	76	6435.18	817.967	5617.22
43	37	106	81.4873	256	305930	88856.3	217074
44	10	86	33.4225	105	34926.9	6375.87	28551.1
45	6	48	23.2366	73	8989.48	1227.37	7762.11
46	10	13	14.9606	47	1611.25	152.278	1458.97
47	9	24	17.507	55	3424.71	380.344	3044.37
48	2	7	6.3662	20	104.936	5.52771	99.4083
49	2	10	5.41127	17	115.465	6.20808	109.257
50	35	97	69.0732	217	213661	57468.6	156193
51	24	31	31.5127	99	18872.1	3019.86	15852.2
52	9	33	20.3718	64	5869.23	731.477	5137.76
53	4	8	8.91268	28	274.547	17.7674	256.78
54	5	16	13.6873	43	1176.13	103.914	1072.21
55	3	12	10.1859	32	450.224	32.3895	417.834
56	2	10	5.41127	17	115.465	6.20808	109.257
57	1	7	3.81972	12	35.5706	1.48651	34.0841
58	1	1	3.50141	11	4.38809	0.117183	4.27091
59	2	6	7.32113	23	113.476	6.07851	107.398
60	2	16	8.27606	26	372.992	25.7742	347.218
61	15	35	28.0113	88	13101.2	1938.92	11162.3
62	8	36	21.6451	68	6650.78	851.354	5799.43
63	31	75	49.6563	156	97509.1	22174	75335.1
64	33	86	74.8028	235	206076	55001.4	151075
65	2	26	11.1408	35	1023.74	87.8039	935.937
66	18	53	32.4676	102	27231.3	4713.19	22518.1
67	17	46	27.3747	86	18109.2	2872.32	15236.9
68	27	87	44.5634	140	89240.9	19912.6	69328.4
69	5	42	15.9155	50	3935.1	450.214	3484.89
70	6	51	15.5972	49	4978.28	598.959	4379.32
71	20	76	48.3831	152	73788.8	15808.2	57980.6
72	13	81	14.6423	46	12166.7	1772.32	10394.4
73	7	18	12.7324	40	1414.85	130.049	1284.8
74	29	52	44.5634	140	56077.5	11328.5	44749
75	10	20	11.1408	35	1756.81	169.138	1587.68
76	5	26	9.5493	30	1115.87	97.4872	1018.39
77	9	13	5.72958	18	562.902	42.4784	520.423
78	1	6	3.81972	12	30.4891	1.23281	29.2563
79	2	5	2.54648	8	20.3909	0.756483	19.6344
80	2	26	8.59437	27	646.998	50.3012	596.696
81	8	35	14.3239	45	3516.45	392.747	3123.7
82	2	20	11.1408	35	787.493	63.8538	723.64
83	9	36	19.0986	60	5821.15	724.209	5096.94
84	15	37	22.2817	70	10226.1	1435.26	8790.85
85	3	13	7.95775	25	327.403	22.0015	305.401
86	2	5	6.3662	20	74.9543	3.67406	71.2802
87	33	68	38.1972	120	67800.9	14264.7	53536.2
88	33	74	47.7465	150	95787.9	21699.7	74088.2
89	8	38	22.2817	70	7349.14	961.067	6388.07
90	36	105	63.662	200	210034	56286.3	153748
91	11	50	20.6901	65	10166.6	1425.13	8741.5
92	12	19	22.2817	70	4515.84	532.102	3983.74
93	7	50	20.6901	65	8140.82	1088.16	7052.66
94	4	35	10.8225	34	1616.51	152.882	1463.63
95	5	20	13.369	42	1416.73	130.258	1286.47
96	7	56	32.7859	103	19842.1	3209.34	16632.8
97	3	8	9.23099	29	255.315	16.268	239.047
98	10	23	15.5972	49	3006.14	324.673	2681.47
99	5	19	8.59437	27	705.514	55.8764	649.637
100	4	10	10.8225	34	461.86	33.4086	428.451
101	13	37	23.8732	75	10164	1424.68	8739.29
102	2	79	25.1465	79	14201.2	2138.28	12062.9
103	17	42	30.8761	97	19431.6	3128.91	16302.7
104	13	24	29.9211	94	9131.03	1250.87	7880.16
105	4	17	15.2789	48	1382.17	126.411	1255.76
106	12	14	14.9606	47	2006.13	198.703	1807.42
107	8	22	16.2338	51	2634.47	276.608	2357.87
108	4	11	9.5493	30	418.682	29.6559	389.026
109	10	88	29.2845	92	28807.8	5046.47	23761.3
110	6	50	22.9183	72	9146.73	1253.49	7893.25
111	13	72	44.5634	140	51538.8	10225.3	41313.6
112	16	48	40.4254	127	31881.1	5707.31	26173.8
113	22	115	28.3296	89	57498.7	11678	45820.7
114	18	23	24.5099	77	8224.68	1101.79	7122.89
115	36	53	45.2	142	68908.4	14548.1	54360.3
116	12	32	23.2366	73	8065.77	1076	6989.77
117	20	44	31.1944	98	23003.5	3840.26	19163.2
118	5	23	9.86761	31	1033.92	88.8647	945.054
119	16	56	45.5183	143	44806.4	8627.19	36179.2
120	4	29	19.7352	62	3677.8	414.731	3263.07
121	11	14	18.7803	59	2493.36	258.726	2234.64
122	11	52	39.1521	123	28378.3	4955.29	23423
123	15	82	44.2451	139	61103.1	12572.6	48530.6
124	6	37	26.1014	82	8465.02	1140.99	7324.03
125	8	35	28.3296	89	10017	1399.71	8617.28
126	7	37	21.6451	68	6480.56	824.974	5655.58
127	4	24	11.4592	36	1213.59	107.946	1105.64
128	12	37	28.0113	88	12251.3	1787.29	10464

## Sheet: Haad Khom
Haad Khom
				alpha	0.01946
				beta	1.214
Survey year 2015.1										Survey year 2016
Nr. of Sponge	osculum diameter [cm]	height [cm]	base diameter [cm]	bc = bd * Pi [cm]	V_sponge [cm³]	V_spongocoel [cm³]	V_final [cm³]			Nr. of Sponge	osculum diameter [cm]	height [cm]	base diameter [cm]	bc = bd * Pi [cm]	V_sponge [cm³]	V_spongocoel [cm³]	V_final [cm³]
1	17	89	37.8789	119	55168.9	11106.1	44062.9			1	4	10	6	18.8496	198.968	12.0189	186.949
2	18	77	43.6085	137	60690.3	12469.5	48220.8			2	4	9	9	28.2743	313.374	20.8623	292.512
3	12	64	30.5577	96	24202.3	4084.56	20117.8			3	6	10	8	25.1327	387.463	26.9932	360.47
4	22	47	28.9662	91	24120.6	4067.83	20052.8			4	6	16	12	37.6991	1055.58	91.1294	964.446
5	9	13	11.4592	36	1073.58	93.0201	980.562			5	8	19	15	47.1239	2034.44	202.114	1832.33
6	11	38	27.693	87	11863.7	1718.88	10144.8			6	10	22	15	47.1239	2735.8	289.577	2446.23
7	8	56	17.1887	54	7285.85	951.029	6334.82			7	26	35	30	94.2478	21588	3555.3	18032.7
8	13	59	29.9211	94	22447.1	3727.79	18719.3			8	4	28	5	15.708	447.153	32.1216	415.032
9	16	66	42.6535	134	47651	9296.56	38354.4			9	6	20	8	25.1327	774.926	62.6188	712.307
10	9	29	19.4169	61	4804.09	573.613	4230.48			10	8	35	8	25.1327	1759.29	169.427	1589.86
11	10	36	23.8732	75	8563.96	1157.2	7406.75			11	11	42	20	62.8319	8147.72	1089.28	7058.44
12	19	72	48.3831	152	68258.1	14381.6	53876.5			12	30	27	20	62.8319	13430.3	1998.2	11432.1
13	2	18	7.95775	25	392.265	27.3999	364.865			13	4	29	8	25.1327	850.324	70.0904	780.234
14	4	18	9.86761	31	720.242	57.2956	662.946			14	7	23	12	37.6991	1667.92	158.805	1509.12
15	11	43	19.4169	61	8010.77	1067.1	6943.67			15	7	23	15	47.1239	2282.11	232.361	2049.74
16	4	20	13.0507	41	1248.91	111.771	1137.14			16	7	20	14	43.9823	1795.94	173.722	1622.22
17	14	36	36.2873	114	19045.5	3053.59	15991.9			17	7	30	15	47.1239	2976.66	320.812	2655.85
18	9	25	20.6901	65	4550.68	537.091	4013.59			18	5	30	20	62.8319	4123.34	476.492	3646.85
19	9	21	14.0056	44	2216.75	224.308	1992.45			19	11	48	20	62.8319	9311.68	1280.98	8030.7
20	4	20	14.9606	47	1569.02	147.447	1421.57			20	2.8	29	8	25.1327	715.487	56.8368	658.65
21	2	20	12.0958	38	913.676	76.4795	837.197			21	4.6	39	10	31.4159	1706.73	163.302	1543.43
22	4	18	9.5493	30	685.117	53.9214	631.195
23	3	24	11.1408	35	1046.41	90.1695	956.238
24	6	57	26.4197	83	13318.7	1978.06	11340.6
25	19	10	7.00282	22	1421.81	130.826	1290.99
26	11	15	16.2338	51	2211.32	223.64	1987.68
27	8	22	10.8225	34	1541.88	144.357	1397.53
28	6	35	15.2789	48	3308.91	364.788	2944.12
29	4	22	8.91268	28	755.004	60.6699	694.334
30	10	57	19.0986	60	9785.36	1360.51	8424.84
31	7	48	12.0958	38	3518.31	393	3125.31
32	19	30	14.9606	47	6825.65	878.606	5947.05
33	4	31	8.91268	28	1063.87	91.9995	971.87
34	2	10	4.77465	15	95.1551	4.90862	90.2465
35	11	60	15.2789	48	8207.59	1099.01	7108.59
36	6	58	17.8254	56	6995.37	905.196	6090.17
37	7	56	18.7803	59	7816.55	1035.77	6780.78
38	6	26	14.9606	47	2379.53	244.457	2135.07
39	3	9	4.77465	15	108.671	5.76743	102.903
40	2	6	2.86479	9	28.1747	1.12014	27.0546
41	5	12	10.8225	34	616.506	47.438	569.068
42	13	6	13.369	42	819.214	66.9896	752.224
43	4	13	14.0056	44	912.723	76.3826	836.34
44	10	8	10.1859	32	640.072	49.6484	590.424
45	4	24	10.1859	32	1008.43	86.2122	922.217
46	11	18	14.3239	45	2279.57	232.047	2047.52
47	7	18	10.8225	34	1139.86	100.037	1039.82
48	2	8	3.50141	11	48.7212	2.17787	46.5434
49	1	4	2.86479	9	12.6416	0.423379	12.2182
50	7	34	21.3268	67	5813.52	723.056	5090.47
51	2	10	6.3662	20	149.909	8.52307	141.386
52	25	47	26.1014	82	24102.4	4064.1	20038.3
53	4	11	7.00282	22	267.967	17.2518	250.715
54	1	9	4.45634	14	59.6477	2.78429	56.8635
55	8	24	11.1408	35	1741.98	167.406	1574.58
56	8	17	10.8225	34	1191.46	105.561	1085.9
57	5	15	12.0958	38	910.224	76.1288	834.095
58	3	8	6.04789	19	133.456	7.40123	126.055
59	1	9	2.86479	9	28.4435	1.13313	27.3104
60	2	7	4.45634	14	60.0571	2.8075	57.2496
61	2	12	7.00282	22	210.628	12.8793	197.749
62	11	12	13.6873	43	1441.69	133.049	1308.64
63	4	40	9.23099	29	1446.55	133.594	1312.95
64	8	33	18.462	58	4773.61	569.197	4204.41
65	3	22	9.86761	31	783.145	63.426	719.719
66	8	35	15.9155	50	4074.11	469.594	3604.51
67	2	10	10.1859	32	335.43	22.6581	312.772
68	3	13	9.5493	30	438.483	31.367	407.116
69	5	24	20.3718	64	3404.67	377.644	3027.03
70	5	12	9.5493	30	515.019	38.1326	476.886
71	3	12	5.72958	18	185.407	11.0318	174.375
72	9	62	19.7352	62	10519.6	1485.42	9034.18
73	5	20	9.5493	30	858.365	70.8958	787.469
74	5	66	12.7324	40	4333.1	506.076	3827.02
75	15	48	8.59437	27	5375.63	657.482	4718.14
76	8	72	20.0535	63	11810.6	1709.55	10101.1
77	20	66	37.2423	117	43746.9	8380.17	35366.7
78	31	18	12.0958	38	6985.07	903.578	6081.49
79	8	47	24.5099	77	10591.9	1497.83	9094.1
80	5	36	18.1437	57	4193.19	486.308	3706.88
81	7	51	23.2366	73	10035.1	1402.79	8632.36
82	6	46	25.1465	79	9865.73	1374.09	8491.64
83	2	30	8.91268	28	795.303	64.6234	730.68
84	22	154	78.3042	246	336174	99630.3	236544
85	8	18	20.6901	65	3098.88	336.873	2762.01
86	8	51	20.0535	63	8365.84	1124.79	7241.06
87	15	40	33.1042	104	19032.3	3051.03	15981.3
88	5	24	12.0958	38	1456.36	134.695	1321.66
89	20	66	17.507	55	18257.4	2900.88	15356.5
90	25	100	18.7803	59	37887.8	7037.86	30849.9
91	9	74	25.1465	79	18204.3	2890.63	15313.6
92	4	30	13.369	42	1949.41	191.905	1757.51
93	3	35	12.7324	40	1917.91	188.147	1729.77
94	5	30	13.6873	43	2205.24	222.894	1982.34
95	4	29	10.8225	34	1339.39	121.677	1217.72
96	6	28	11.7775	37	1798.68	174.043	1624.64
97	8	61	35.0141	110	25074.1	4263.86	20810.3
98	2	13	9.5493	30	388.966	27.1203	361.845
99	6	30	18.462	58	3829.73	435.621	3394.11
100	11	60	26.1014	82	17112.2	2681.5	14430.7
101	7	20	11.1408	35	1314.78	118.968	1195.81
102	21	9	4.77465	15	1329.05	120.537	1208.51
103	1	12	7.32113	23	194.528	11.6941	182.833
104	4	34	15.2789	48	2764.35	293.249	2471.1
105	6	35	20.3718	64	5252.61	639.261	4613.35
106	2	10	7.63944	24	203.261	12.3344	190.926
107	13	45	29.6028	93	16848.7	2631.45	14217.3
108	12	22	17.8254	56	3891.45	444.159	3447.29

## Sheet: Koh Yippon
Koh Yippon
				alpha	0.01946
				beta	1.214
Survey year 2015.1										Survey year 2016
Nr. of Sponge	osculum diameter [cm]	height [cm]	base diameter [cm]	bc = bd * Pi [cm]	V_sponge [cm³]	V_spongocoel [cm³]	V_final [cm³]			Nr. of Sponge	osculum diameter [cm]	height [cm]	base diameter [cm]	bc = bd * Pi [cm]	V_sponge [cm³]	V_spongocoel [cm³]	V_final [cm³]
1	13	46	28.6479	90	16403.8	2547.32	13856.4			1	2	2	3	9.42478	9.94838	0.316529	9.63185
2	2	14	8.91268	28	371.142	25.6191	345.522			2	2	7	5	15.708	71.4712	3.46783	68.0034
3	5	40	13.6873	43	2940.32	316.063	2624.25			3	3	5	5	15.708	64.1409	3.04092	61.0999
4	7	73	14.6423	46	6992.68	904.774	6087.91			4	2	7	5	15.708	71.4712	3.46783	68.0034
5	17	26	18.1437	57	6307.4	798.291	5509.11			5	2	10	5	15.708	102.102	5.34699	96.7548
6	2	13	7.32113	23	245.865	15.5399	230.325			6	4	13	7	21.9911	316.515	21.1165	295.399
7	24	37	33.1042	104	23890.9	4020.84	19870			7	1	7	10	31.4159	203.418	12.346	191.072
8	15	30	20.3718	64	7426.64	973.385	6453.25			8	5	10	8	25.1327	337.721	22.8461	314.875
9	24	53	31.831	100	32650.9	5875.05	26775.8			9	2	20	10	31.4159	649.262	50.5151	598.747
10	2	11	5.09296	16	115.549	6.21358	109.336			10	7	11	9	28.2743	555.8	41.8287	513.971
11	1	7	7.00282	22	104.535	5.5021	99.0333			11	5	20	7	21.9911	570.723	43.1959	527.527
12	5	5	5.09296	16	100.011	5.21438	94.7969			12	6	18	10	31.4159	923.628	77.4919	846.136
13	9	40	19.0986	60	6467.95	823.026	5644.92			13	6	28	8	25.1327	1084.9	94.2116	990.685
14	11	61	28.6479	90	20071.3	3254.38	16816.9			14	5	15	15	47.1239	1276.27	114.751	1161.52
15	12	40	25.4648	80	11498.6	1654.87	9843.7			15	7	15	14	43.9823	1346.96	122.512	1224.45
16	2	47	7.95775	25	1024.25	87.8566	936.391			16	4	34	10	31.4159	1388.58	127.123	1261.46
17	8	46	27.3747	86	12432.6	1819.45	10613.1			17	6	18	13	40.8407	1333.61	121.039	1212.57
18	6	29	12.4141	39	2008.85	199.031	1809.82			18	3	35	11	34.5575	1493.57	138.884	1354.68
19	21	46	38.1972	120	32541.6	5851.18	26690.4			19	8	26	11	34.5575	1858.25	181.066	1677.19
20	19	13	19.0986	60	3705.03	418.462	3286.57			20	8	20	16	50.2655	2345.72	240.247	2105.48
21	30	59	30.2394	95	42038.4	7984.53	34053.9			21	11	30	15	47.1239	4013.38	461.11	3552.27
22	39	60	35.0141	110	64599.6	13451.2	51148.3			22	12	36	15	47.1239	5174.2	627.695	4546.51
23	9	40	11.1408	35	3198	349.997	2848			23	13	32	15	47.1239	4934.39	592.555	4341.84
24	12	50	17.1887	54	8452.42	1138.93	7313.49			24	10	50	12	37.6991	4764.75	567.915	4196.83
25	3	13	10.8225	34	539.761	40.3678	499.393			25	12	50	11	34.5575	5196.72	631.013	4565.71
26	25	59	47.7465	150	63304.4	13124.5	50179.9			26	8	100	10	31.4159	6387.91	810.677	5577.23
27	16	30	26.1014	82	10641.4	1506.33	9135.08			27	10	20	30	94.2478	6806.78	875.658	5931.13
28	38	22	38.1972	120	25080.2	4265.12	20815.1			28	13	50	12	37.6991	6139.2	772.521	5366.67
29	30	74	32.4676	102	56728	11488.2	45239.7			29	3	80	15	47.1239	5843.36	727.564	5115.8
30	3	18	9.5493	30	607.13	46.5636	560.566			30	16	22	25	78.5398	7378.03	965.656	6412.37
31	8	26	14.3239	45	2612.22	273.774	2338.44			31	15	37	17	53.4071	7448.98	976.941	6472.04
32	6	24	17.8254	56	2894.63	310.111	2584.52			32	27	27	15	47.1239	9606.2	1330.33	8275.87
33	15	52	29.9211	94	21360.9	3509.96	17851			33	3	100	20	62.8319	12278.4	1792.09	10486.3
34	4	31	12.0958	38	1709.92	163.673	1546.25			34	22	30	25	78.5398	13029.8	1926.09	11103.7
35	11	46	14.0056	44	5674.79	702.163	4972.63			35	20	49	20	62.8319	15393.8	2358.2	13035.6
36	24	153	31.831	100	94256.4	21279.2	72977.1			36	21	39	27	84.823	17735.1	2800.44	14934.6
37	13	121	33.4225	105	54503.4	10943.6	43559.8			37	20	37	28	87.9646	16893.4	2639.92	14253.5
38	7	28	14.0056	44	2515.77	261.551	2254.22			38	20	100	12	37.6991	20525.1	3343.92	17181.1
39	4	26	12.0958	38	1434.13	132.203	1301.92			39	9	40	40	125.664	21373.3	3512.42	17860.9
40	11	41	25.7831	81	11478.5	1651.37	9827.14			40	13	50	40	125.664	29962.9	5293.18	24669.8
41	1	8	4.45634	14	53.0202	2.41332	50.6069			41	36	50	31	97.3894	44152.5	8474.58	35677.9
42	10	65	24.5099	77	16095.2	2489.27	13605.9			42	6	100	40	125.664	49113.6	9644.09	39469.5
43	23	127	40.7437	128	103940	23961.6	79978.3			43	20	40	60	188.496	54454.3	10931.6	43522.6
44	2	49	9.86761	31	1553.55	145.684	1407.87			44	6	100	50	157.08	74246.3	15927.3	58319
45	7	57	17.1887	54	6935.62	895.819	6039.8			45	32	69	45	141.372	81090	17726.8	63363.3
46	9	17	11.1408	35	1359.15	123.859	1235.29			46	6	100	60	188.496	104615	24150.7	80464.3
47	9	34	15.9155	50	4250.69	494.416	3756.27			47	20	60	80	251.327	131947	32011.6	99935.3
48	10	18	17.1887	54	2673.53	281.594	2391.93			48	34	45	90	282.743	145094	35924.2	109170
49	9	63	14.3239	45	6846.24	881.824	5964.42			49	1	5	4	12.5664	27.4889	1.08713	26.4018
50	4	60	14.0056	44	4212.57	489.038	3723.53			50	1	11	5	15.708	89.2736	4.54277	84.7308
51	5	71	17.507	55	7788.86	1031.32	6757.54			51	1	13	4	12.5664	71.4712	3.46783	68.0034
52	5	58	13.0507	41	3956.66	453.21	3503.45			52	1	5	10	31.4159	145.299	8.20594	137.093
53	7	23	10.1859	32	1349.12	122.75	1226.37			53	2	12	5	15.708	122.522	6.67168	115.85
54	11	43	13.0507	41	4895.59	586.903	4308.69			54	1	6	8	25.1327	114.668	6.15611	108.512
55	7	66	19.0986	60	9459.19	1305.66	8153.54			55	1	14	5	15.708	113.621	6.08792	107.533
56	12	60	17.8254	56	10613	1501.46	9111.59			56	1	5	13	40.8407	239.546	15.0564	224.49
57	8	45	13.0507	41	3990.53	457.924	3532.6			57	4	8	9	28.2743	278.555	18.0827	260.472
58	9	39	14.6423	46	4361.54	510.112	3851.43			58	4	9	8	25.1327	263.894	16.9339	246.96
59	8	74	22.6	71	14637.6	2218.31	12419.3			59	5	3	15	47.1239	255.254	16.2633	238.991
60	6	44	20.0535	63	6433.05	817.638	5615.42			60	3	7	10	31.4159	254.731	16.2228	238.508
61	7	25	13.6873	43	2173.94	219.06	1954.88			61	3	15	5	15.708	192.423	11.5406	180.882
62	8	33	14.3239	45	3315.51	365.671	2949.84			62	4	7	11	34.5575	331.7	22.3526	309.347
63	6	42	13.6873	43	3358.78	371.473	2987.31			63	3	19	8	25.1327	482.496	35.2293	447.267
64	18	120	35.0141	110	68494.3	14442	54052.3			64	2	29	6	18.8496	394.793	27.6144	367.179
65	5	48	18.462	58	5757.34	714.582	5042.76			65	2	12	15	47.1239	813.672	66.4399	747.233
66	11	42	15.2789	48	5745.32	712.771	5032.54			66	5	15	9	28.2743	592.976	45.2491	547.727
67	2	11	5.09296	16	115.549	6.21358	109.336			67	5	15	10	31.4159	687.223	54.1227	633.101
68	29	81	41.3803	130	79592.7	17330.2	62262.6			68	3	25	9	28.2743	765.763	61.7211	704.042
69	26	53	31.1944	98	34135.4	6200.88	27934.5			69	8	13	10	31.4159	830.428	68.1044	762.323
70	2	14	8.91268	28	371.142	25.6191	345.522			70	5	23	8	25.1327	776.759	62.7986	713.96
71	20	84	26.1014	82	35258.7	6449.46	28809.2			71	4	18	9	28.2743	626.748	48.3964	578.351
72	9	23	14.9606	47	2646.18	278.101	2368.08			72	9	7	15	47.1239	808.175	65.8953	742.279
73	6	64	14.9606	47	5857.3	729.672	5127.63			73	9	5	18	56.5487	742.201	59.4232	682.778
74	2	22	7.00282	22	386.152	26.8824	359.27			74	3	20	10	31.4159	727.802	58.0266	669.776
75	11	64	26.738	84	18934	3031.9	15902.1			75	11	14	4	12.5664	663.4	51.8535	611.546
76	8	39	16.8704	53	4937.38	592.991	4344.39			76	4	16	9	28.2743	557.109	41.9483	515.161
77	12	32	17.1887	54	5409.55	662.522	4747.03			77	4	24	8	25.1327	703.717	55.7037	648.013
78	2	18	7.63944	24	365.869	25.178	340.691			78	3	8	15	47.1239	584.336	44.45	539.886
79	4	30	12.0958	38	1654.76	157.285	1497.48			79	2	21	13	40.8407	1094.06	95.1784	998.881
80	4	42	10.8225	34	1939.81	190.758	1749.05			80	4	21	10	31.4159	857.655	70.8246	786.83
81	23	36	27.0563	85	17750.1	2803.31	14946.8			81	6	27	7	21.9911	897.71	74.86	822.85
82	3	22	9.86761	31	783.145	63.426	719.719			82	5	7	21	65.9734	1046.41	90.17	956.242
83	4	16	10.5042	33	705.207	55.8469	649.36			83	3	10	18	56.5487	1013.16	86.7037	926.46
84	59	92	73.5296	231	318552	93326.1	225226			84	3	19	14	43.9823	1228.62	109.572	1119.05
85	6	17	8.91268	28	751.757	60.3533	691.404			85	3	20	13	40.8407	1136.21	99.6482	1036.56
86	12	29	16.8704	53	4791.09	571.729	4219.36			86	5	39	10	31.4159	1786.78	172.646	1614.13
87	8	46	12.0958	38	3698.02	417.501	3280.52			87	9	23	10	31.4159	1631.8	154.639	1477.16
88	26	97	63.0254	198	159652	40345.6	119306			88	6	9	21	65.9734	1420.79	130.711	1290.07
89	40	104	51.8845	163	173366	44590.7	128775			89	4	21	13	40.8407	1302.98	117.673	1185.3
90	3	15	7.95775	25	377.773	26.1758	351.597			90	6	19	13	40.8407	1407.7	129.251	1278.44
91	15	111	52.8394	166	110706	25868.2	84837.7			91	5	29	11	34.5575	1526.03	142.557	1383.47
92	23	56	35.969	113	38851.9	7255.86	31596			92	5	20	14	43.9823	1523.67	142.29	1381.38
93	8	54	26.1014	82	13488.2	2008.66	11479.5			93	6	26	11	34.5575	1517.91	141.637	1376.28
94	3	28	14.6423	46	1959.58	193.12	1766.46			94	8	12	18	56.5487	1671.33	159.199	1512.13
95	5	30	11.1408	35	1608.67	151.983	1456.69			95	6	21	15	47.1239	1929.72	189.554	1740.17
96	3	15	8.91268	28	452.287	32.5698	419.717			96	11	21	10	31.4159	1819.77	176.523	1643.24
97	15	54	30.5577	96	22861.8	3811.56	19050.2			97	8	16	18	56.5487	2228.44	225.743	2002.69
98	2	10	5.41127	17	115.465	6.20808	109.257			98	6	32	11	34.5575	1868.2	182.243	1685.96
99	5	16	13.6873	43	1176.13	103.914	1072.21			99	5	42	10	31.4159	1924.23	188.899	1735.33
100	8	64	31.1944	98	21557.9	3549.29	18008.6			100	8	25	15	47.1239	2676.9	282.025	2394.87
101	6	11	9.5493	30	531.278	39.599	491.679			101	17	15	13	40.8407	2666.43	280.686	2385.74
102	3	34	12.7324	40	1863.12	181.641	1681.47			102	9	9	29	91.1062	2787.38	296.217	2491.16
103	5	17	11.4592	36	950.682	80.256	870.426			103	7	29	14	43.9823	2604.12	272.744	2331.37
104	14	56	45.2	142	42103.4	7999.51	34103.9			104	5	26	17	53.4071	2715.91	287.022	2428.88
105	1	13	5.72958	18	134.63	7.48035	127.15			105	3	23	21	65.9734	3088.97	335.565	2753.41
106	8	34	16.8704	53	4304.38	502.008	3802.38			106	3	63	12	37.6991	3117.25	339.298	2777.95
107	6	15	11.1408	35	891.284	74.21	817.074			107	14	18	20	62.8319	4128.05	477.153	3650.9
108	20	46	28.6479	90	21600.6	3557.83	18042.8			108	10	31	15	47.1239	3855	439.113	3415.88
109	6	33	10.8225	34	1883.92	184.107	1699.82			109	7	53	14	43.9823	4759.25	567.12	4192.13
110	19	48	24.8282	78	18210.8	2891.9	15318.9			110	10	40	15	47.1239	4974.19	598.361	4375.83
111	8	32	5.72958	18	1195.18	105.962	1089.22			111	13	25	20	62.8319	5425.79	664.938	4760.85
112	14	60	31.831	100	25994.3	4454.55	21539.7			112	13	17	24	75.3982	4704.27	559.176	4145.1
113	4	18	11.4592	36	910.193	76.1256	834.067			113	7	35	20	62.8319	5396.99	660.656	4736.34
114	2	14	7.00282	22	245.733	15.5298	230.203			114	7	45	20	62.8319	6938.99	896.348	6042.64
115	8	36	28.9662	91	10695	1515.54	9179.42			115	9	39	20	62.8319	6748.93	866.63	5882.3
116	5	44	15.2789	48	3857.06	439.398	3417.66			116	6	65	16	50.2655	6602.58	843.869	5758.71
117	4	17	11.7775	37	898.212	74.9108	823.301			117	14	7	56	175.929	7542.96	991.925	6551.04
118	16	45	36.9239	116	26037.8	4463.62	21574.2			118	11	51	21	65.9734	10588	1497.15	9090.81
119	5	65	22.6	71	11039.9	1575.08	9464.84			119	13	58	20	62.8319	12587.8	1847.07	10740.8
120	1	24	7.95775	25	454.171	32.7346	421.436			120	25	22	25	78.5398	10799.2	1533.49	9265.73
121	3	62	16.2338	51	5214.19	633.589	4580.6			121	7	55	25	78.5398	12224.7	1782.59	10442.1
122	6	84	22.2817	70	14649.7	2220.54	12429.2			122	14	35	25	78.5398	10729.8	1521.54	9208.31
123	5	98	30.5577	96	28518.7	4985.06	23533.6			123	14	50	20	62.8319	11466.8	1649.33	9817.49
124	2	9	5.09296	16	94.5403	4.87014	89.6701			124	4	50	30	94.2478	13561.2	2021.87	11539.3
125	1	54	11.1408	35	1926.32	189.149	1737.17			125	10	65	24	75.3982	15587.5	2394.28	13193.3
126	5	38	10.8225	34	1952.27	192.246	1760.02			126	8	83	20	62.8319	13559.1	2021.49	11537.6
127	2	24	9.23099	29	676.53	53.1021	623.428			127	8	55	31	97.3894	18329.9	2914.87	15415
128	4	28	13.369	42	1819.45	176.486	1642.96			128	12	55	31	97.3894	21267.3	3491.28	17776
129	5	20	7.95775	25	670.806	52.5571	618.249			129	10	55	30	94.2478	18718.7	2990.09	15728.6
130	9	25	14.6423	46	2795.86	297.312	2498.55			130	7	61	30	94.2478	18509	2949.47	15559.5
131	3	15	5.09296	16	197.202	11.8895	185.313			131	22	65	20	62.8319	22530.5	3744.6	18785.9
132	16	42	20.0535	63	10764.7	1527.54	9237.13			132	13	66	30	94.2478	25209.7	4291.87	20917.8
133	12	93	20.3718	64	19562.4	3154.5	16407.9			133	19	60	36	113.097	36772.3	6787.12	29985.2
134	13	97	19.4169	61	20275.9	3294.71	16981.2			134	6	25	80	251.327	45265.1	8734.54	36530.6
135	6	107	26.1014	82	24479.9	4141.51	20338.4			135	21	80	40	125.664	60339.5	12382.1	47957.4
136	8	45	15.2789	48	4944.18	593.982	4350.2			136	18	75	50	157.08	73120.6	15634.6	57486
137	4	26	11.1408	35	1257.09	112.661	1144.43
138	2	11	5.72958	18	139.057	7.78	131.277
139	1	6	2.86479	9	18.9623	0.692634	18.2697
140	9	69	19.0986	60	11157.2	1595.42	9561.79
141	8	42	16.5521	52	5172.2	627.4	4544.8
142	28	106	74.4845	234	233592	64039.9	169552
143	11	35	24.8282	78	9259.63	1272.29	7987.34
144	6	56	18.462	58	7148.83	929.36	6219.47
145	9	76	28.6479	90	23070.9	3853.93	19217
146	20	73	45.5183	143	64640	13461.4	51178.6
147	3	24	16.5521	52	2089.97	208.83	1881.14
148	6	34	7.63944	24	1247.92	111.665	1136.26
149	13	33	20.3718	64	7333.5	958.585	6374.91
150	9	48	28.0113	88	14045.8	2109.92	11935.9
151	26	60	31.831	100	39534.1	7410.82	32123.3
152	9	66	22.9183	72	14039.2	2108.71	11930.5
153	2	14	8.27606	26	326.368	21.9171	304.451
154	20	56	28.6479	90	26296.4	4517.49	21778.9
155	1	15	4.77465	15	112.202	5.99573	106.206
156	17	26	26.4197	83	9775.47	1358.85	8416.63
157	25	53	37.2423	117	40835.8	7708.09	33127.7
158	1	10	5.72958	18	103.562	5.43994	98.1217
159	3	19	11.1408	35	828.406	67.9032	760.503
160	2	7	5.41127	17	80.8255	4.0263	76.7992
161	2	9	8.91268	28	238.591	14.9836	223.607
162	6	9	14.3239	45	770.756	62.21	708.546
163	6	18	12.7324	40	1293.59	116.644	1176.95
164	3	5	8.27606	26	133.938	7.4337	126.505
165	4	7	11.7775	37	369.852	25.5111	344.341
166	3	12	6.68451	21	231.649	14.456	217.193
167	40	18	39.4704	124	22321.3	3702.45	18618.9
168	10	6	14.0056	44	685.204	53.9297	631.274
169	5	10	8.27606	26	353.098	24.115	328.983
170	3	9	5.41127	17	128.449	7.06551	121.384
171	17	27	19.4169	61	7041.04	912.376	6128.66
172	17	35	30.8761	97	16193	2507.65	13685.4
173	7	34	13.369	42	2860.07	305.622	2554.45
174	5	34	15.2789	48	2980.46	321.308	2659.15
175	17	56	16.5521	52	12378.9	1809.93	10569
176	34	54	46.1549	145	68643.7	14480.2	54163.4
177	20	40	45.2	142	35050.1	6403.18	28646.9
178	18	13	20.3718	64	3763.15	426.444	3336.7
179	8	48	31.831	100	16736.6	2610.21	14126.4
180	10	19	16.2338	51	2615.8	274.23	2341.57
181	3	18	8.59437	27	511.983	37.8599	474.123
182	8	6	10.1859	32	391.506	27.3355	364.17
183	4	12	10.8225	34	554.232	41.6854	512.546
184	8	18	17.8254	56	2470.92	255.902	2215.02
185	4	14	10.8225	34	646.604	50.2641	596.34
186	13	32	22.6	71	8156.08	1090.64	7065.44
187	17	17	17.8254	56	4049.03	466.087	3582.94
188	2	11	10.1859	32	368.973	25.4375	343.535
189	7	36	16.5521	52	4135.94	478.26	3657.68
190	8	49	14.6423	46	5073.97	612.965	4461.01
191	1	30	7.95775	25	567.713	42.9196	524.794
192	2	25	12.4141	39	1197.32	106.192	1091.13
193	1	16	6.68451	21	219.355	13.5299	205.825
194	8	77	32.7859	103	28246.2	4927.3	23318.9
195	5	24	10.8225	34	1233.01	110.047	1122.97
196	1	30	11.1408	35	1070.18	92.6622	977.516
197	6	15	6.3662	20	450.527	32.416	418.111
198	3	31	12.0958	38	1554.94	145.843	1409.1
199	5	26	10.5042	33	1278.72	115.019	1163.7
200	8	39	16.5521	52	4802.76	573.42	4229.34
201	30	77	44.5634	140	85125.5	18803.3	66322.1
202	22	40	44.5634	140	36131.3	6643.76	29487.6
203	15	40	29.2845	92	15936.8	2459.56	13477.2
204	24	60	14.6423	46	17935.5	2838.91	15096.6
205	7	60	20.6901	65	9768.99	1357.75	8411.24
206	6	35	17.1887	54	3982.09	456.749	3525.34
207	1	5	4.13803	13	29.14	1.1669	27.9731
208	1	4	2.54648	8	10.5045	0.338136	10.1663
209	5	15	11.1408	35	804.337	65.5156	738.821
210	5	9	9.23099	29	368.429	25.392	343.037
211	29	45	38.1972	120	40146.5	7550.43	32596.1
212	5	37	15.9155	50	3466.64	386.004	3080.63
213	18	58	32.1493	101	29400.9	5172.89	24228.1
214	7	31	15.9155	50	3357.59	371.313	2986.28
215	4	5	7.95775	25	145.504	8.22001	137.284
216	22	54	77.9859	245	117077	27686.4	89390.5
217	1	25	4.45634	14	165.688	9.62416	156.064
218	6	13	10.5042	33	712.548	56.5535	655.995
219	2	20	7.63944	24	406.521	28.6134	377.908
220	3	35	10.8225	34	1453.2	134.34	1318.86
221	5	79	18.1437	57	9201.71	1262.64	7939.07
222	8	55	23.2366	73	11372.8	1632.92	9739.87
223	8	72	27.3747	86	19459.7	3134.4	16325.3
224	3	59	14.6423	46	4129.11	477.301	3651.8
225	28	100	70.0282	220	200243	53117.1	147126
226	16	48	21.6451	68	13456.5	2002.92	11453.5
227	11	52	36.9239	116	25737	4401.09	21335.9
228	6	66	15.9155	50	6648.8	851.046	5797.75
229	10	39	21.3268	67	7842.42	1039.93	6802.49
230	25	163	41.3803	130	143887	35561.7	108326
231	8	86	31.831	100	29986.5	5298.23	24688.3
232	1	16	7.95775	25	302.78	20.0093	282.771
233	16	92	24.5099	77	30080.2	5318.34	24761.9
234	16	28	17.507	55	6176.65	778.246	5398.4
235	10	76	21.3268	67	15282.7	2337.55	12945.1
236	12	50	24.1916	76	13345.6	1982.91	11362.7
237	3	20	5.72958	18	309.011	20.5103	288.501
238	9	40	18.1437	57	6005.53	752.149	5253.38
239	6	110	21.9634	69	18723.6	2991.04	15732.5
240	3	52	11.1408	35	2267.22	230.522	2036.7
241	8	46	26.738	84	11956.4	1735.2	10221.2
242	7	65	14.3239	45	6031.54	756.106	5275.44
243	2	54	9.5493	30	1615.7	152.79	1462.91
244	3	18	8.91268	28	542.744	40.6388	502.105
245	4	36	10.1859	32	1512.64	141.04	1371.6
246	11	70	11.7775	37	7133.58	926.954	6206.62
247	1	8	3.81972	12	40.6521	1.74812	38.904
248	2	10	7.00282	22	175.524	10.3221	165.202
249	5	40	8.59437	27	1485.29	137.95	1347.34
250	13	71	30.8761	97	28322.5	4943.46	23379.1
251	1	12	2.54648	8	31.5134	1.28327	30.2302
252	2	33	5.72958	18	417.172	29.526	387.646
253	5	29	9.5493	30	1244.63	111.307	1133.32
254	14	124	38.5155	121	72024.6	15350.6	56674.1
255	4	73	17.8254	56	7740.95	1023.62	6717.33
256	2	30	12.4141	39	1436.79	132.501	1304.29
257	6	43	17.1887	54	4892.29	586.422	4305.86
258	1	28	8.59437	27	611.775	46.9965	564.779
259	11	28	24.8282	78	7407.7	970.373	6437.33
260	5	55	14.3239	45	4345.54	507.841	3837.7
261	4	116	24.8282	78	22222.3	3682.52	18539.8
262	2	36	7.63944	24	731.739	58.4078	673.331
263	2	17	11.7775	37	739.971	59.2065	680.765

## Sheet: Hin Yippon
Hin Yippon
				alpha	0.01946
				beta	1.214
Survey year 2015.1										Survey year 2016
Nr. of Sponge	osculum diameter [cm]	height [cm]	base diameter [cm]	bc = bd * Pi [cm]	V_sponge [cm³]	V_spongocoel [cm³]	V_final [cm³]			Nr. of Sponge	osculum diameter [cm]	height [cm]	base diameter [cm]	bc = bd * Pi [cm]	V_sponge [cm³]	V_spongocoel [cm³]	V_final [cm³]
1	3	20	10.1859	32	750.373	60.2184	690.154			1	3	7	5	15.708	89.7972	4.57513	85.2221
2	3	27	10.5042	33	1066.31	92.2553	974.051			2	2	12	4	12.5664	87.9646	4.46203	83.5026
3	5	19	16.5521	52	1898.81	185.875	1712.94			3	3	8	7	21.9911	165.457	9.60787	155.849
4	14	27	20.0535	63	6212.53	783.738	5428.79			4	3	7	10	31.4159	254.731	16.2228	238.508
5	4	29	12.0958	38	1599.6	150.943	1448.66			5	3	13	7	21.9911	268.868	17.3222	251.546
6	37	66	49.6563	156	98005.8	22311.2	75694.6			6	3	12	12	37.6991	593.761	45.3218	548.439
7	2	13	7.00282	22	228.181	14.1936	213.987			7	3	20	10	31.4159	727.802	58.0266	669.776
8	10	31	20.3718	64	5833.05	726.007	5107.05			8	3	20	10	31.4159	727.802	58.0266	669.776
9	4	18	9.86761	31	720.242	57.2956	662.946			9	2	20	10	31.4159	649.262	50.5151	598.747
10	20	54	36.2873	114	34530.3	6288.07	28242.2			10	5	16	9	28.2743	632.507	48.9369	583.57
11	2	4	2.86479	9	18.7832	0.684696	18.0985			11	6	12	10	31.4159	615.752	47.3676	568.385
12	4	29	10.8225	34	1339.39	121.677	1217.72			12	3	16	10	31.4159	582.242	44.2566	537.985
13	19	29	19.0986	60	8265.07	1108.36	7156.72			13	5	20	10	31.4159	916.298	76.7459	839.552
14	24	94	44.8817	141	90254.7	20187.5	70067.2			14	3	30	10	31.4159	1091.7	94.9297	996.774
15	21	74	42.0169	132	59839.3	12257.6	47581.7			15	7	20	10	31.4159	1146.68	100.764	1045.92
16	2	9	12.4141	39	431.037	30.7216	400.315			16	7	15	10	31.4159	860.011	71.0609	788.95
17	6	14	16.8704	53	1546.1	144.836	1401.27			17	5	20	12	37.6991	1199.04	106.377	1092.66
18	3	15	9.5493	30	505.942	37.3182	468.623			18	4	21	10	31.4159	857.655	70.8246	786.83
19	1	29	6.04789	19	331.208	22.3123	308.895			19	3	22	12	37.6991	1088.56	94.5981	993.964
20	2	15	7.00282	22	263.285	16.8866	246.399			20	6	15	12	37.6991	989.602	84.262	905.34
21	3	18	8.91268	28	542.744	40.6388	502.105			21	5	30	10	31.4159	1374.45	125.554	1248.89
22	4	22	11.4592	36	1112.46	97.125	1015.33			22	10	20	10	31.4159	1570.8	147.65	1423.15
23	5	34	15.5972	49	3082.11	334.66	2747.45			23	4	27	13	40.8407	1675.25	159.653	1515.6
24	1	18	3.81972	12	91.4673	4.67864	86.7887			24	8	18	12	37.6991	1432.57	132.028	1300.54
25	4	17	10.1859	32	714.304	56.7227	657.582			25	3	35	10	31.4159	1273.65	114.466	1159.19
26	15	37	19.0986	60	8487.72	1144.71	7343.01			26	5	40	8	25.1327	1350.88	122.946	1227.94
27	13	49	22.2817	70	12252.6	1787.53	10465.1			27	7	19	12	37.6991	1377.85	125.931	1251.92
28	9	24	21.3268	67	4572.72	540.251	4032.47			28	5	22	12	37.6991	1318.95	119.426	1199.52
29	4	19	10.8225	34	877.534	72.8224	804.711			29	7	20	15	47.1239	1984.44	196.099	1788.34
30	2	19	7.63944	24	386.195	26.886	359.309			30	8	18	15	47.1239	1927.37	189.273	1738.09
31	4	36	16.2338	51	3246.57	356.461	2890.11			31	9	17	15	47.1239	1962.71	193.495	1769.21
32	4	9	10.8225	34	415.674	29.3974	386.276			32	9	27	12	37.6991	2353.84	241.257	2112.58
33	10	22	12.0958	38	2115.3	211.906	1903.39			33	7	20	14	43.9823	1795.94	173.722	1622.22
34	26	74	49.9747	157	86652.4	19213.6	67438.8			34	9	20	18	56.5487	2968.81	319.784	2649.02
35	1	12	5.72958	18	124.274	6.78767	117.486			35	7	17	21	65.9734	2835.03	302.376	2532.65
36	1	26	7.00282	22	388.274	27.0618	361.213			36	7	25	15	47.1239	2480.55	257.113	2223.44
37	1	12	5.72958	18	124.274	6.78767	117.486			37	10	30	15	47.1239	3730.64	421.976	3308.67
38	15	58	24.1916	76	17812.8	2815.35	14997.5			38	10	30	15	47.1239	3730.64	421.976	3308.67
39	2	45	11.1408	35	1771.86	170.898	1600.96			39	12	30	15	47.1239	4311.84	503.063	3808.77
40	3	34	7.00282	22	703.62	55.6943	647.925			40	10	25	20	62.8319	4581.49	541.508	4039.98
41	1	19	8.59437	27	415.133	29.351	385.782			41	10	33	17	53.4071	4829.41	577.285	4252.13
42	16	66	24.8282	78	21938.6	3625.53	18313.1			42	10	13	30	94.2478	4424.41	519.052	3905.36
43	14	68	26.1014	82	22123.1	3662.56	18460.5			43	8	45	15	47.1239	4818.42	575.69	4242.73
44	32	82	66.5268	209	162695	41281.2	121414			44	12	30	20	62.8319	6157.52	775.321	5382.2
45	1	10	4.45634	14	66.2753	3.1642	63.1111			45	18	30	15	47.1239	6432.41	817.539	5614.87
46	1	9	2.54648	8	23.6351	0.904984	22.7301			46	12	31	20	62.8319	6362.77	806.807	5555.97
47	3	50	10.8225	34	2076	207.137	1868.87			47	13	37	15	47.1239	5705.39	706.763	4998.63
48	4	47	11.4592	36	2376.61	244.094	2132.52			48	13	24	22	69.115	5899.91	736.121	5163.79
49	3	35	7.63944	24	827.227	67.7859	759.441			49	12	23	22	69.115	5371.08	656.806	4714.27
50	8	36	12.0958	38	2894.1	310.042	2584.06			50	10	28	25	78.5398	7147.12	929.091	6218.03
51	11	107	36.6056	115	52205.1	10386	41819.2			51	15	40	20	62.8319	9686.58	1343.86	8342.72
52	15	54	21.3268	67	14133.4	2125.89	12007.5			52	17	15	40	125.664	10088.4	1411.84	8676.6
53	10	40	16.2338	51	5506.94	677.031	4829.91			53	11	41	24	75.3982	10315.2	1450.45	8864.71
54	26	92	56.6592	178	129084	31170.4	97913.7			54	9	64	18	56.5487	9500.18	1312.53	8187.65
55	15	94	28.0113	88	35186.2	6433.37	28752.8			55	15	29	24	75.3982	8814.52	1198.43	7616.09
56	22	67	36.9239	116	46652.7	9060.65	37592.1			56	17	42	17	53.4071	9533.16	1318.06	8215.1
57	9	43	16.2338	51	5523.32	679.476	4843.85			57	12	30	30	94.2478	11027	1572.84	9454.15
58	10	32	15.5972	49	4182.46	484.798	3697.66			58	25	30	20	62.8319	11977.3	1738.89	10238.4
59	9	22	14.9606	47	2531.13	263.491	2267.64			59	20	32	23	72.2566	11636.5	1678.99	9957.46
60	25	51	33.4225	105	34415.9	6262.8	28153.1			60	20	34	24	75.3982	12960.1	1913.6	11046.5
61	7	19	13.369	42	1598.27	150.791	1447.48			61	11	48	24	75.3982	12076.3	1756.34	10319.9
62	19	64	31.1944	98	32283.5	5794.9	26488.6			62	19	50	25	78.5398	19124.4	3068.96	16055.5
63	4	22	9.23099	29	795.601	64.6527	730.948			63	19	58	25	78.5398	22184.4	3674.88	18509.5
64	15	42	19.0986	60	9634.71	1335.13	8299.58			64	17	60	30	94.2478	26687.8	4599.25	22088.6
65	16	30	13.6873	43	5202.01	631.792	4570.21			65	9	63	35	109.956	26735.7	4609.28	22126.5
66	13	23	18.1437	57	4420.06	518.433	3901.63			66	20	60	30	94.2478	29845.1	5267.92	24577.2
67	6	75	22.9183	72	13720.1	2050.66	11669.4			67	78	16	30	94.2478	39056.3	7302.23	31754
68	6	10	8.27606	26	403.562	28.3608	375.202			68	30	60	31	97.3894	43840.9	8402.04	35438.9
69	4	15	7.00282	22	365.409	25.1395	340.27			69	29	52	35	109.956	41943.4	7962.63	33980.8
70	3	14	6.68451	21	270.257	17.4309	252.826			70	22	64	37	116.239	44686	8599.06	36086.9
71	6	24	12.0958	38	1601.47	151.158	1450.32			71	25	55	45	141.372	54356.1	10907.7	43448.4
72	11	29	14.3239	45	3672.63	414.024	3258.61			72	33	80	38	119.381	79314.7	17256.7	62058
73	1	5	3.81972	12	25.4076	0.988026	24.4196			73	25	100	40	125.664	84430.3	18617.1	65813.2
74	12	24	11.1408	35	2524.64	262.671	2261.97			74	35	79	50	157.08	113235	26587.3	86647.5
75	3	19	9.5493	30	640.859	49.7225	591.137			75	1	10	3	9.42478	34.0339	1.40891	32.625
76	25	32	26.738	84	16825.3	2627.01	14198.3			76	1	15	4	12.5664	82.4668	4.12578	78.341
77	35	35	25.4648	80	25333.1	4317.38	21015.7			77	1	14	4	12.5664	76.969	3.79429	73.1747
78	9	25	14.9606	47	2876.28	307.726	2568.56			78	3	10	4	12.5664	96.8658	5.01596	91.8498
79	9	49	29.9211	94	15978.3	2467.34	13511			79	4	9	5	15.708	143.728	8.09837	135.629
80	16	60	20.3718	64	15660.2	2407.84	13252.4			80	3	12	8	25.1327	304.734	20.1662	284.568
81	20	54	24.5099	77	21077.5	3453.5	17624			81	1	14	7	21.9911	208.916	12.7523	196.164
82	4	18	9.23099	29	650.946	50.6742	600.272			82	3	14	6	18.8496	230.907	14.3998	216.507
83	7	54	12.7324	40	4244.55	493.55	3751			83	3	16	5	15.708	205.251	12.4812	192.77
84	24	47	47.7465	150	49238.5	9673.88	39564.6			84	4	25	6	18.8496	497.419	36.5564	460.862
85	6	15	11.7775	37	963.579	81.5797	882			85	5	15	7	21.9911	428.042	30.4626	397.579
86	2	13	6.68451	21	211.186	12.9207	198.265			86	4	15	10	31.4159	612.611	47.0744	565.536
87	8	30	13.0507	41	2660.35	279.91	2380.44			87	6	15	8	25.1327	581.195	44.16	537.035
88	6	15	12.4141	39	1039.06	89.4013	949.657			88	6	16	9	28.2743	716.283	56.9136	659.37
89	22	138	63.662	200	214509	57745.3	156763			89	5	18	10	31.4159	824.668	67.5314	757.137
90	6	20	13.369	42	1544.33	144.635	1399.69			90	2	25	10	31.4159	811.578	66.2323	745.346
91	23	88	47.1099	148	88279.9	19652.5	68627.3			91	8	15	12	37.6991	1193.81	105.813	1087.99
92	12	69	29.9211	94	25259.6	4302.18	20957.4			92	8	15	10	31.4159	958.186	81.0257	877.16
93	9	48	27.0563	85	13277	1970.55	11306.5			93	5	20	10	31.4159	916.298	76.7459	839.552
94	31	98	47.1099	148	119065	28258.1	90806.4			94	5	20	10	31.4159	916.298	76.7459	839.552
95	39	100	78.6225	247	281926	80465	201461			95	10	10	13	40.8407	1044.58	89.9783	954.601
96	13	29	22.2817	70	7251.57	945.599	6305.97			96	11	16	9	28.2743	1260.83	113.068	1147.76
97	8	53	15.5972	49	5994.85	750.526	5244.32			97	8	27	10	31.4159	1724.73	165.395	1559.34
98	9	46	17.1887	54	6396.53	812.007	5584.53			98	5	22	13	40.8407	1491.73	138.677	1353.06
99	1	12	6.04789	19	137.051	7.64398	129.407			99	4	29	11	34.5575	1374.18	125.525	1248.66
100	4	13	9.86761	31	520.175	38.5965	481.578			100	5	26	12	37.6991	1558.75	146.277	1412.48
101	14	51	32.4676	102	22760.7	3791.1	18969.6			101	5	15	20	62.8319	2061.67	205.402	1856.27
102	24	110	43.9268	138	102515	23563.4	78951.5			102	10	25	10	31.4159	1963.5	193.589	1769.91
103	4	30	15.5972	49	2526.32	262.884	2263.44			103	8	21	14	43.9823	2045.18	203.409	1841.77
104	12	59	28.9662	91	20553.2	3349.49	17203.7			104	7	28	12	37.6991	2030.52	201.64	1828.88
105	5	33	14.6423	46	2700.73	285.076	2415.65			105	9	25	13	40.8407	2402.01	247.264	2154.75
106	6	53	22.9183	72	9695.54	1345.37	8350.17			106	9	19	15	47.1239	2193.62	221.469	1972.15
107	13	29	26.4197	83	9190.02	1260.69	7929.33			107	10	15	15	47.1239	1865.32	181.902	1683.42
108	9	38	24.8282	78	9161.38	1255.92	7905.45			108	10	30	12	37.6991	2858.85	305.463	2553.39
109	13	43	25.1465	79	12701.1	1867.27	10833.9			109	8	23	16	50.2655	2697.58	284.673	2412.91
110	10	54	17.8254	56	8425.71	1134.56	7291.14			110	6	31	15	47.1239	2848.64	304.139	2544.5
111	8	48	16.2338	51	5747.94	713.167	5034.78			111	6	31	16	50.2655	3148.92	343.488	2805.44
112	5	18	14.6423	46	1473.13	136.58	1336.55			112	8	31	13	40.8407	2735.02	289.476	2445.54
113	1	10	5.09296	16	83.8574	4.21039	79.647			113	10	19	16	50.2655	2566.68	267.991	2298.69
114	24	53	33.1042	104	34222.1	6220.01	28002.1			114	9	15	20	62.8319	2595.74	271.679	2324.06
115	2	15	7.00282	22	263.285	16.8866	246.399			115	4	26	20	62.8319	3376.16	373.808	3002.36
116	16	40	31.5127	99	18360	2920.68	15439.3			116	9	30	15	47.1239	3463.61	385.594	3078.01
117	1	10	3.81972	12	50.8152	2.29202	48.5232			117	8	31	15	47.1239	3319.35	366.186	2953.17
118	7	58	18.1437	57	7671.11	1012.42	6658.69			118	10	19	20	62.8319	3481.93	388.072	3093.86
119	11	39	25.4648	80	10716.3	1519.2	9197.07			119	9	22	25	78.5398	5362.18	655.485	4706.69
120	6	19	8.91268	28	840.199	69.0785	771.121			120	10	64	10	31.4159	5026.55	606.016	4420.53
121	6	40	13.0507	41	2980.59	321.326	2659.26			121	10	51	13	40.8407	5327.36	650.321	4677.03
122	8	19	11.7775	37	1476.98	137.013	1339.96			122	9	50	16	50.2655	6296.28	796.582	5499.69
123	12	43	26.1014	82	12816.5	1887.89	10928.6			123	11	46	16	50.2655	6659.65	852.733	5806.92
124	5	86	11.4592	36	4809.33	574.372	4234.96			124	9	59	16	50.2655	7429.6	973.857	6455.75
125	3	13	10.1859	32	487.742	35.6949	452.047			125	15	60	15	47.1239	10602.9	1499.71	9103.17
126	3	6	11.4592	36	274.402	17.756	256.646			126	10	54	20	62.8319	9896.02	1379.21	8516.8
127	2	6	4.77465	15	57.093	2.64019	54.4529			127	11	46	22	69.115	10200.2	1430.85	8769.37
128	5	15	17.1887	54	1595.91	150.521	1445.39			128	10	65	20	62.8319	11911.9	1727.36	10184.5
129	9	26	33.7408	106	10367.5	1459.39	8908.11			129	10	61	21	65.9734	11993.3	1741.7	10251.6
130	1	4	5.41127	17	37.3777	1.57868	35.799			130	9	65	20	62.8319	11248.2	1611.23	9636.98
131	1	17	6.04789	19	194.156	11.667	182.489			131	14	52	20	62.8319	11925.5	1729.76	10195.7
132	2	33	8.59437	27	821.189	67.1857	754.004			132	13	40	25	78.5398	11718.1	1693.31	10024.8
133	1	10	5.09296	16	83.8574	4.21039	79.647			133	11	70	20	62.8319	13579.5	2025.19	11554.3
134	4	51	12.0958	38	2813.1	299.539	2513.56			134	15	56	22	69.115	15232.5	2328.24	12904.3
135	10	26	18.1437	57	4156.42	481.137	3675.28			135	20	33	34	106.814	19317.7	3106.64	16211
136	10	27	21.0085	66	5311.61	647.989	4663.62			136	14	31	40	125.664	19120.8	3068.25	16052.5
137	8	20	15.5972	49	2262.21	229.903	2032.3			137	15	76	20	62.8319	18404.5	2929.28	15475.2
138	18	29	18.462	58	7570.62	996.342	6574.28			138	13	61	30	94.2478	23299.9	3900.41	19399.5
139	10	16	17.1887	54	2376.47	244.076	2132.39			139	22	90	25	78.5398	39089.3	7309.72	31779.5
140	8	14	11.7775	37	1088.3	94.5704	993.729			140	21	50	45	141.372	44649.9	8590.62	36059.3
141	2	11	11.7775	37	478.805	34.9024	443.902			141	21	63	38	119.381	44251.7	8497.71	35754
142	1	19	7.32113	23	308.002	20.429	287.573			142	16	100	40	125.664	65345.1	13639.9	51705.2
143	12	36	22.6	71	8726.97	1184	7542.97			143	27	85	35	109.956	64511.3	13428.9	51082.4
144	2	15	7.63944	24	304.891	20.1788	284.712			144	11	70	60	188.496	80286	17513.6	62772.4
145	9	24	11.7775	37	2046.47	203.565	1842.91			145	22	110	40	125.664	85357.1	18865.5	66491.6
146	4	9	8.59437	27	292.735	19.2063	273.529			146	35	76	48	150.796	103642	23878.3	79763.8
147	1	14	9.5493	30	372.891	25.7657	347.125			147	27	102	50	157.08	122275	29185.9	93089.6
148	6	15	12.0958	38	1000.92	85.4335	915.488			148	25	120	55	172.788	157865	39798.1	118067
149	4	40	16.5521	52	3729.92	421.877	3308.04			149	27	95	65	204.204	166859	42567.3	124292
150	1	11	6.04789	19	125.631	6.87772	118.753
151	1	14	7.00282	22	209.071	12.7638	196.307
152	2	25	11.1408	35	984.367	83.7212	900.645
153	1	19	7.00282	22	283.739	18.4921	265.247
154	5	13	7.95775	25	436.024	31.1536	404.87
155	2	19	10.1859	32	637.317	49.389	587.928
156	1	14	7.00282	22	209.071	12.7638	196.307
157	15	31	25.1465	79	10019.3	1400.1	8619.18
158	3	15	8.27606	26	401.815	28.2118	373.603
159	32	66	49.6563	156	87754.6	19510.7	68243.9
160	26	86	46.4732	146	91051.1	20404	70647.1
161	3	9	7.63944	24	212.716	13.0344	199.681
162	8	53	22.9183	72	10720	1519.85	9200.19
163	14	46	40.107	126	28494.1	4979.84	23514.2
164	1	1	1.90986	6	1.71673	0.0375034	1.67923
165	3	9	10.8225	34	373.68	25.832	347.848
166	2	7	3.81972	12	48.0684	2.1425	45.9259
167	10	66	20.3718	64	12418.8	1817	10601.8
168	2	19	13.369	42	1041.94	89.702	952.234
169	4	34	11.4592	36	1719.25	164.758	1554.5
170	39	126	75.1211	236	332965	98477	234488
171	5	14	17.8254	56	1582.89	149.03	1433.86
172	10	16	17.8254	56	2496.51	259.122	2237.38
173	3	22	13.0507	41	1258.31	112.794	1145.52
174	7	35	24.1916	76	7363.11	963.286	6399.83
175	8	46	21.0085	66	8109.88	1083.14	7026.73
176	1	30	8.27606	26	610.798	46.9053	563.892
177	3	52	14.0056	44	3364.93	372.299	2992.63
178	1	26	8.27606	26	529.358	39.4253	489.933
179	6	46	11.7775	37	2954.98	317.977	2637
180	3	42	7.63944	24	992.673	84.5796	908.093
181	19	60	53.1578	167	65922.3	13786.3	52136
182	14	48	18.1437	57	9791.76	1361.6	8430.17
