# Supplementary material for: Mass mortality event of the giant barrel sponge Xestospongia sp.: population dynamics and size distribution in Koh Phangan, Gulf of Thailand
Source: PeerJ. 2023 Dec 12;11:e16561. doi: 10.7717/peerj.16561 (PMC10722979; doi:10.7717/peerj.16561)
Supplement: Supplemental Information 5 [file peerj-11-16561-s005.xlsx]

## Sheet: Bleaching 2015.2
Abundances and fitness / Bleaching event, 2015.5
Mae Haad 2015.2							Haad Khom 2015.2
2th April 2015							9th+12th April 2015
	4m	4m	6m	6m				4m	4m	6m	6m
	bleached	healthy	bleached	healthy				healthy	bleached	healthy	bleached
T1	24	0	2	0			T1	0	4	1	7
T2	7	3	5	1			T2	1	5	5	3
T3	1	0	0	1			T3	0	2	0	5
							T4	2	10	3	11
Total	32	3	7	2			T5	0	34	0	6
							T6	4	13	4	2
							Total	7	68	13	34
