# Supplementary material for: Mass mortality event of the giant barrel sponge Xestospongia sp.: population dynamics and size distribution in Koh Phangan, Gulf of Thailand
Source: PeerJ journal article supplement (doi:10.7717/peerj.16561), 2023-12-12
Supplement: SupplementalTableS1.pdf [file SupplementalTableS1.pdf]

|            |                 | <u>Mean</u> |          | <u>Variance</u> |          | P-Value |
|------------|-----------------|-------------|----------|-----------------|----------|---------|
|            |                 | 4m depth    | 6m depth | 4m depth        | 6m depth |         |
| Mae Haad   | 2015.1          | -           | -        | -               | -        | -       |
|            | 2015.2 bleached | 10.7        | 2.3      | 142.3           | 6.3      | 0.179   |
|            | 2016            | -           | -        | -               | -        | -       |
| Haad Khom  | 2015.1          | 10.3        | 7.7      | 20.3            | 3.5      | 0.111   |
|            | 2015.2 bleached | 11.3        | 5.7      | 139.9           | 10.3     | 0.150   |
|            | 2016            | 2.0         | 1.5      | 1.2             | 1.1      | 0.219   |
| Koh Yippon | 2015.1          | 51.7        | 36.0     | 25.3            | 25.0     | 0.009 * |
|            | 2015.2 bleached | -           | -        | -               | -        | -       |
|            | 2016            | 16.0        | 44.0     | 31.0            | 288.0    | 0.133   |
| Hin Yippon | 2015.1          | 29.3        | 31.3     | 86.3            | 82.3     | 0.401   |
|            | 2015.2 bleached | -           | -        | -               | -        | -       |
|            | 2016            | 24.7        | 33.0     | 252.3           | 392.0    | 0.334   |
